# Supplementary material for: Foxr1 deletion causes microcephaly and leads to cortical and hippocampal hypoplasia
Source: Front Neurosci. 2025 May 27;19:1589043. doi: 10.3389/fnins.2025.1589043 (PMC12149149; doi:10.3389/fnins.2025.1589043)
Supplement: SUPPLEMENTARY TABLE 1 — Primary and secondary antibodies used for immunostaining. [file Table_1.xlsx]

## Sheet: Sheet1
Primary Antibodies	Species	Dilution	IHC Protocol	Cat . #	RRID #	Company
polyclonal anti-CC3	Rabbit	1:400	sodium citrate	9661	AB_2341188	Cell Signaling
monoclonal anti-Ctip2	Rat	1:500	sodium citrate	ab18465	AB_2064130	Abcam
monoclonal anti-Gfap	Mouse	1:1000	sodium citrate	75-240	AB_10672299	Antibodies Inc.
monoclonal anti-Iba1	Rabbit	1:200	sodium citrate	ab178847	AB_2832244	Abcam
monoclonal anti-Ki67	Rabbit	1:500	sodium citrate	12202	AB_2620142	Cell Signaling
polyclonal anti-MAP2	Rabbit	1:500	HistoVT	A5622	AB_91939	Millipore
monoclonal anti-Neun	Mouse	1:500	sodium citrate	ab104224	AB_10711040	Abcam
monoclonal anti-Satb2	Mouse	1:200	sodium citrate	ab51502	AB_882455	Abcam
monoclonal anti-Sox2	Mouse	1:50	HistoVT+	sc-365823	AB_10842165	Santa Cruz
polyclonal anti-Tbr1	Rabbit	1:500	sodium citrate	ab31940	AB_2200219	Abcam
polyclonal anti-Tbr2	Rabbit	1:250	HistoVT+	ab23345	AB_778267	Abcam
Secondary Antibodies	Species	Dilution	HistoVT+ Dilution	Cat . #	RRID #	Company
Alexa Fluor 488 goat anti-mouse IgG	Goat	1:500	1:250	A11029	AB_2534088	Invitrogen
Alexa Fluor 488 goat anti-rabbit IgG	Goat	1:500	n/a	A11034	AB_2576217	Invotrogen
Alexa Fluor 488 goat anti-rat IgG	Goat	1:500	n/a	A11006	AB_141373	Invitrogen
Alexa Fluor 546 goat anti-mouse IgG	Goat	1:500	n/a	A11030	AB_2737024	Invitrogen
Alexa Fluor 546 goat anti-rabbit IgG	Goat	1:500	1:250	A11010	AB_2534077	Invitrogen
